# Supplementary material for: In vitro susceptibility of clinical Clostridioides difficile isolates to ridinilazole and ibezapolstat in Israel, 2020-2022
Source: Research Square preprint supplement (doi:10.21203/rs.3.rs-5818289/v1), 2025-01-20
Supplement: Supplementary file 1 [file 97d04f4c38e8a70b0358f90a.docx]

**Supplemental Table 1: Distribution of sequence types of isolates belong to the "others" group**

| % | n |  |
| --- | --- | --- |
| 0.32 | 1 | **ST1** |
| 1.92 | 6 | **ST4** |
| 0.64 | 2 | **ST5** |
| 1.28 | 4 | **ST6** |
| 0.32 | 1 | **ST7** |
| 1.60 | 5 | **ST8** |
| 0.32 | 1 | **ST12** |
| 1.92 | 6 | **ST14** |
| 0.32 | 1 | **ST16** |
| 0.32 | 1 | **ST17** |
| 0.64 | 2 | **ST21** |
| 1.92 | 6 | **ST28** |
| 0.64 | 2 | **ST35** |
| 1.60 | 5 | **ST36** |
| 0.32 | 1 | **ST39** |
| 0.32 | 1 | **ST43** |
| 1.60 | 5 | **ST48** |
| 0.64 | 2 | **ST49** |
| 0.64 | 2 | **ST51** |
| 0.96 | 3 | **ST53** |
| 0.32 | 1 | **ST59** |
| 0.32 | 1 | **ST63** |
| 0.32 | 1 | **ST69** |
| 1.60 | 5 | **ST76** |
| 0.32 | 1 | **ST82** |
| 1.28 | 4 | **ST92** |
| 0.32 | 1 | **ST98** |
| 0.64 | 2 | **ST102** |
| 0.32 | 1 | **ST103** |
| 1.60 | 5 | **ST110** |
| 0.32 | 1 | **ST129** |
| 0.64 | 2 | **ST139** |
| 0.32 | 1 | **ST149** |
| 1.92 | 6 | **ST153** |
| 0.32 | 1 | **ST160** |
| 0.64 | 2 | **ST237** |
| 0.32 | 1 | **ST239** |
| 0.32 | 1 | **ST301** |
| 0.32 | 1 | **ST325** |
| 1.60 | 5 | **ST421** |
| 0.96 | 3 | **ST429** |
| 0.64 | 2 | **ST564** |
| 0.32 | 1 | **ST578** |
| 0.32 | 1 | **ST604** |
| 0.32 | 1 | **ST1024** |
